# Supplementary material for: Human-associated microbiota suppress invading bacteria even under disruption by antibiotics
Source: PubMed Central journal article supplement (PMC8397715; doi:10.1038/s41396-021-00929-7), 2021-03-12
Supplement: 41396_2021_929_MOESM1_ESM.pdf [file 41396_2021_929_MOESM1_ESM.pdf]

**Supplementary Information:**  
Human-associated microbiota suppress invading  
bacteria even under disruption by antibiotics

Andrew D. Letten<sup>\*1,2</sup>, Michael Baumgartner<sup>\*2</sup>, Katia R  
Pfrunder-Cardozo<sup>2</sup>, Jonathan M. Levine<sup>3</sup>, and Alex R. Hall<sup>2</sup>

<sup>1</sup>School of Biological Sciences, University of Queensland, Brisbane,  
Queensland 4072, Australia

<sup>2</sup>Institute of Integrative Biology, Department of Environmental  
Systems Science, ETH Zürich, 8092 Zürich, Switzerland

<sup>3</sup>Dept of Ecology and Evolutionary Biology, Princeton University,  
Princeton, NJ, 08544-1003 USA

February 1, 2021

This file includes:

Materials and methods

Supplementary Figures S1-S3

---

\*These authors contributed equally.

# 1 **Materials and Methods**

## 2 **Focal strain**

3 We used an *Escherichia coli* K-12 MG1655 strain with a *yfp::ampicillin* resistance  
4 cassette and nucleotide changes at nine positions relative to the ancestral strain,  
5 including mutations in *rpoB* and *basS*, conferring observed resistance to polymyxin  
6 [1] and rifampicin [2]. One day prior to the microcosm experiment, we inoculated  
7 *E.coli* in LB and incubated it overnight at 37°C in a shaking incubator.

## 8 **Microcosm experiment**

9 We used stool samples from consenting human donors that we collected on the  
10 15th of May 2018. The sampling protocol, approved by the ETH Zürich Ethics  
11 Commission (EK 2015-N-55) is described in [3]. In brief, we collected samples  
12 from three anonymous, healthy human donors and mixed the samples with 200  
13 ml of anaerobic peptone wash (1 g/l peptone, 0.5 g/l L-Cysteine, 0.5 g/l bile salts  
14 and 0.001 g/l Resazurin; Sigma-Aldrich) to make a 10% (w/v) anaerobic faecal  
15 slurry. We divided the faecal slurry in two equal volumes and autoclaved one of  
16 the aliquots to create sterilized (community-free) slurry and stored it at -80°C.  
17 We added to the other half of the aliquot glycerol as a cryo-protective agent and  
18 stored it at -80°C until the day of the experiment. There is a risk that freeze-  
19 thawing could lead to the loss of some taxa from the sampled microbiota [4], but  
20 previous studies indicate this risk is small, with frozen slurry containing rich, viable  
21 communities [5–7]. Note also that we do not exclude loss of some taxa, but for  
22 this experiment the aim was to capture abundant and rich communities sampled  
23 from humans (not to recover 100% of all species present in the GI tract).

24 Prior to the microcosm experiment, we filled 54 Hungate tubes with 7.2 ml basal  
25 medium (2 g/l Peptone, 2 g/l Tryptone, 2 g/l Yeast extract, 5 g/l NaCl, 0.04 g  
26 K<sub>2</sub>HPO<sub>4</sub>, 0.04 g/l KH<sub>2</sub>PO<sub>4</sub>, 0.01 g/l MgSO<sub>4</sub>·7H<sub>2</sub>O, 0.01 g/l CaCl<sub>2</sub>·6H<sub>2</sub>O, 0.005  
27 g/l Hemin, 0.5 g/l L-Cysteine, 2g/l Starch, 1.5 g/l casein, 0.001g/l Resazurin, pH  
28 adjusted to 7; Sigma-Aldrich) flushed the headspace with nitrogen to remove oxy-  
29 gen, sealed and autoclaved the tubes. We thawed sterile and live slurries from each  
30 human donor on the morning before the experiment. For each human donor back-  
31 ground, we inoculated 2x10<sup>6</sup> of focal strain with the resident microbial community  
32 (n=9), containing 350 µl of live faecal plus 500 µl of the sterilized slurry, and in the  
33 absence of the community, containing 850 µl of sterilized slurry (community-free  
34 treatment, n=9). To each of these tubes we added either rifampicin (128 µg/ml),  
35 polymyxin (4 µg/ml) or no antibiotics as a control treatment. Before and after  
36 incubation at 37°C in a shaking incubator for 24h, we took samples for plating,  
37 flow cytometry and sequencing. For plating, we diluted samples in PBS (Phos-

38 phate Buffered Solution) and plated them on chromatic MH agar (Liofilchem)  
39 supplemented with rifampicin to count abundance of our focal strain.

40 We quantified total bacterial densities by flow cytometry (Novocyte 2000R, ACEA  
41 Biosciences Inc.). We diluted each sample containing live community with PBS,  
42 stained them with Sybrgreen (final concentration of  $10^{-4}$  of the stock solution, Life  
43 Technologies, Zug, Switzerland) and detected bacteria based on their signature in  
44 a cytogram of green fluorescence versus forward scattered light. For sequencing,  
45 we took samples from all microbiome treatments at 0 and 24h, supplemented them  
46 with glycerol and stored them at  $-80^{\circ}\text{C}$  until further processing.

### 47 **Amplicon sequencing**

48 We used the powerlyzer power soil kit (Qiagen) to extract DNA for amplicon se-  
49 quencing according to the manufacturers protocol with the following modification.  
50 We concentrated each sample before extraction by adding 1.5 ml of each sample  
51 in an extraction tube provided by the kit, centrifuged for 10 min at 10000 rpm,  
52 discarded the supernatant and repeated this step. DNA quality and quantity was  
53 assessed by Nanodrop and Qubit.

54 We sequenced the variable regions V3-V4 of the 16S rRNA gene with previously  
55 described primers [8]. Following the Illumina 16S Metagenomic Sequencing Li-  
56 brary preparation guide for the MiSeq Illumina sequencing platform we amplified  
57 target regions with a limited 17 cycle PCR, followed by a PCR clean-up and  
58 adapter attachment of the Nextera XT Index Kit v2 in a second PCR step. We  
59 assessed quality and quantity of amplicon library by TapeStation and qPCR us-  
60 ing the KAPA library quantification kit. After normalization and pooling we  
61 sequenced the library on the MiSeq sequencing platform using 2x300 V3 kit. We  
62 used Trimmomatic and FLASH to demultiplex and quality-filter the raw paired-  
63 end sequencing reads. We used Usearch software to cluster ZOTUs with a 99%  
64 similarity threshold. For taxonomic assignment prediction against the Silva 16S  
65 rRNA database we used SINTAX.

### 66 **Statistical analysis**

67 Generalised linear models for both focal strain abundance and total biomass with  
68 negative binomial errors and a log link were fit in a Bayesian framework using the  
69 R package *brms* v2.12.0 [9]. Predictors in both models included community (pres-  
70 ence/absence), treatment (antibiotic free, rifampicin and polymyxin) and donor  
71 community/slurry (three levels) and the interaction between community presence  
72 and donor, between community presence and treatment, and between community  
73 presence, donor and treatment. We used default (uninformative) priors, and ran

74 four chain for 2,000 iterations with a warm-up period of 1,000 iterations each, for  
75 a combined total of 4,000 samples. We checked model convergence by visualising  
76 traceplots and checking diagnostics ( $R_{\text{hat}} = \sim 1$ ).

77 16S RNA compositional data was analysed using the R package *Phyloseq* v1.30.0  
78 [10]. We first excluded any OTUs with a total read abundance across all samples  
79 of less than five. To visualise compositional similarity across samples (Fig 2b), we  
80 performed non-metric multidimensional scaling based on the Bray-Curtis distance  
81 between samples.

## 82 Data availability

83 16S rRNA Amplicon sequencing data is deposited in the European Nucleotide  
84 Archive under the Project accession number PRJEB38496.

## 85 Supplementary Figure S1-S3

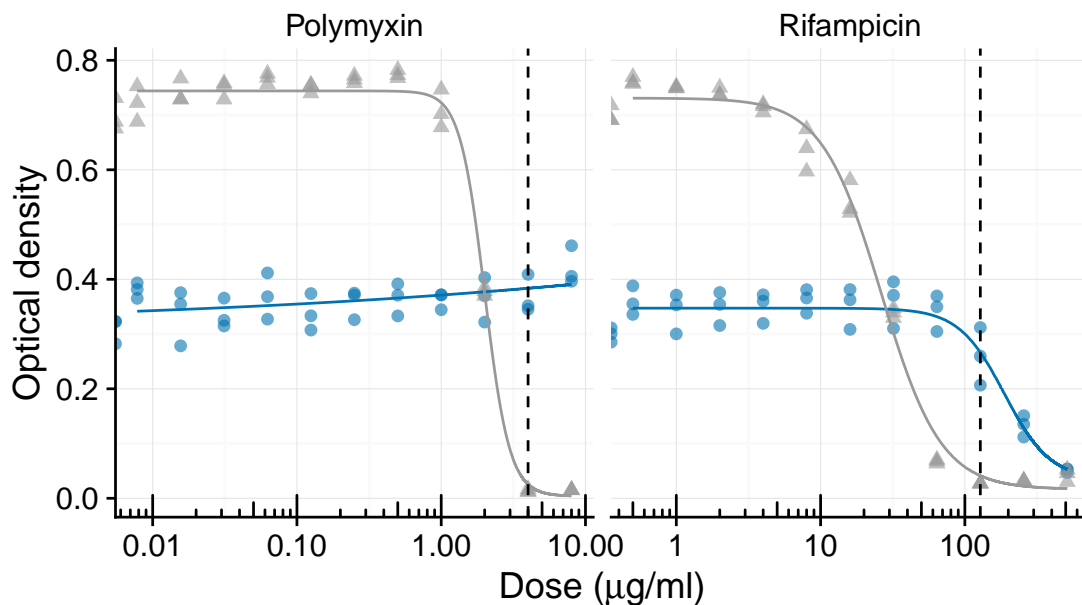

**Figure S1:** Optical density of the focal strain (blue) and its drug sensitive ancestor (grey) after growing for 24 hours in LB supplemented with different concentrations of polymyxin or rifampicin. Vertical dashed lines indicate antibiotic concentrations used in main experiment. Experimental concentrations chosen such that the focal strain can be expected to have an advantage over other sensitive strains in the microbiota.

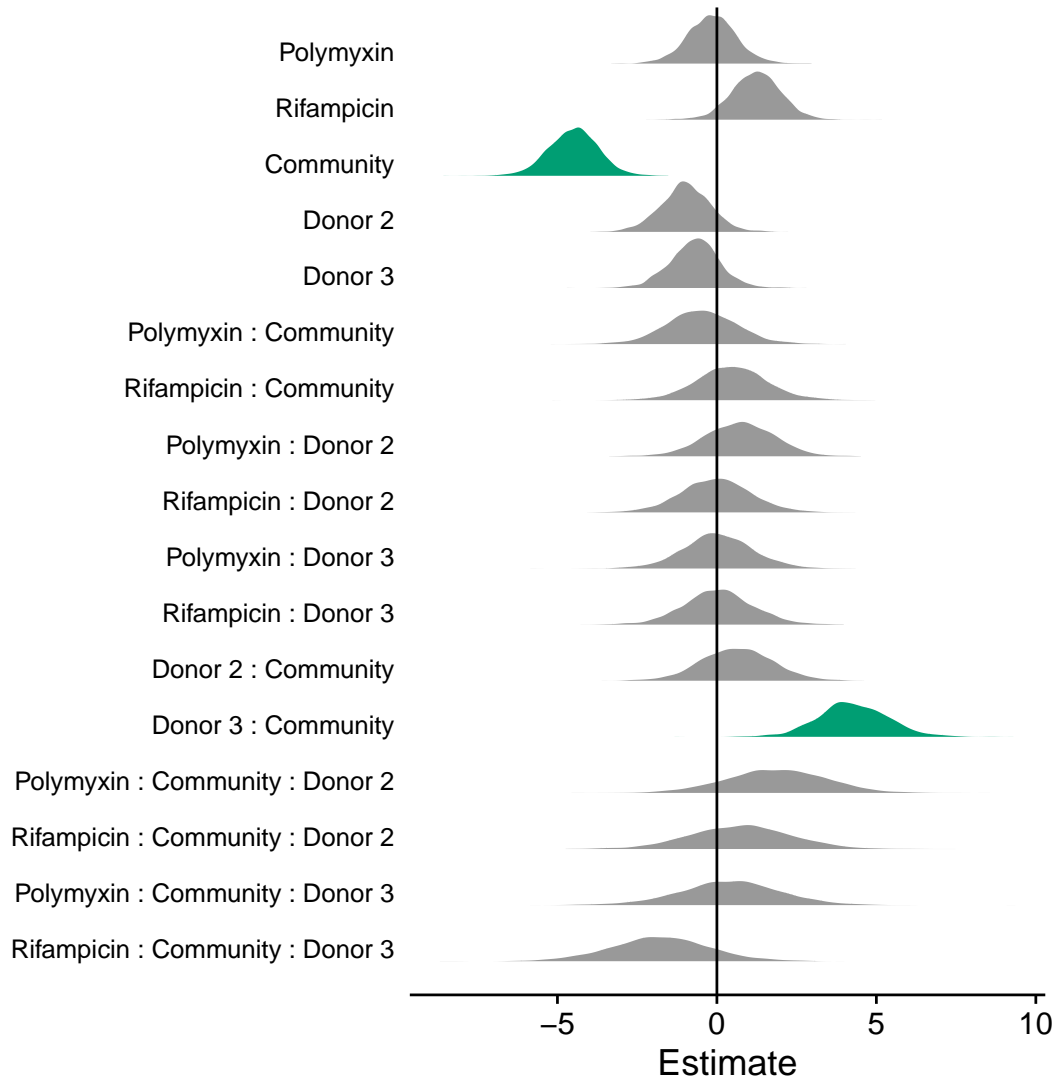

**Figure S2:** Model coefficients (posterior distributions) from a linear model (negative binomial errors) of focal strain abundance as a function of community, antibiotic, and donor, and all pairwise and three-way interactions. Posteriors in green have 95% credible intervals that do not overlap with 0 (i.e., there is less than 5% probability there is no effect of the variables/interactions captured by these coefficients). Intercept (not shown) = donor 1 in the no antibiotic treatment in the absence of the community (i.e., sterilized slurry).

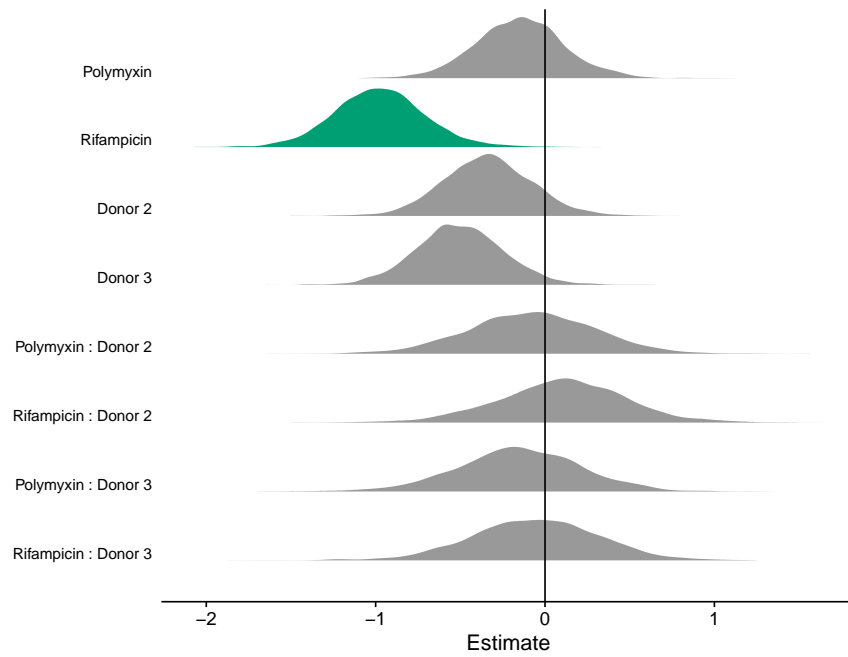

**Figure S3:** Model coefficients (posterior distributions) from a linear model (negative binomial errors) of total bacterial abundance as a function of antibiotic, donor, and their interaction. Posteriors in green have 95% credible intervals that do not overlap with 0 (i.e., there is less than 5% probability there is no effect of the variables/interactions captured by these coefficients). Intercept (not shown) = Donor 1 in the no antibiotic treatment.

## References

- 86
- 87 [1] Poirel, L., Jayol, A. & Nordmann, P. Polymyxins: antibacterial activity, sus-  
88 ceptibility testing, and resistance mechanisms encoded by plasmids or chro-  
89 mosomes. *Clinical microbiology reviews* **30**, 557–596 (2017).
- 90 [2] Goldstein, B. P. Resistance to rifampicin: a review. *The Journal of antibiotics*  
91 **67**, 625–630 (2014).
- 92 [3] Baumgartner, M., Bayer, F., Pfrunder-Cardozo, K. R., Buckling, A. & Hall,  
93 A. R. Resident microbial communities inhibit growth and antibiotic-resistance  
94 evolution of *Escherichia coli* in human gut microbiome samples. *PLOS Biology*  
95 **18**, e3000465 (2020).
- 96 [4] Fouhy, F. *et al.* The Effects of Freezing on Faecal Microbiota as Determined  
97 Using MiSeq Sequencing and Culture-Based Investigations. *PLOS ONE* **10**,  
98 e0119355 (2015).
- 99 [5] Hamilton, M. J., Weingarden, A. R., Sadowsky, M. J. & Khoruts, A. Stan-  
100 dardized frozen preparation for transplantation of fecal microbiota for re-  
101 current *Clostridium difficile* infection. *American Journal of Gastroenterology*  
102 **107**, 761–767 (2012).
- 103 [6] Robinson, C. D., Auchtung, J. M., Collins, J. & Britton, R. A. Epidemic  
104 *Clostridium difficile* strains demonstrate increased competitive fitness com-  
105 pared to nonepidemic isolates. *Infection and Immunity* **82**, 2815–2825 (2014).
- 106 [7] Klümper, U. *et al.* Selection for antimicrobial resistance is reduced when  
107 embedded in a natural microbial community. *The ISME Journal* 1–11 (2019).
- 108 [8] Klindworth, A. *et al.* Evaluation of general 16S ribosomal RNA gene PCR  
109 primers for classical and next-generation sequencing-based diversity studies.  
110 *Nucleic Acids Research* **41**, e1 (2013).
- 111 [9] Bürkner, P.-C. brms: An R package for Bayesian multilevel models using  
112 Stan. *Journal of Statistical Software* **80**, 1–28 (2017).
- 113 [10] McMurdie, P. J. & Holmes, S. phyloseq: an r package for reproducible inter-  
114 active analysis and graphics of microbiome census data. *PloS one* **8** (2013).
